# Supplementary material
Source: PubMed Central journal article supplement (PMC6447239)
Supplement: ct8b01118_si_001.pdf [file ct8b01118_si_001.pdf]

# Supporting Information:

## Ensemble-based replica exchange alchemical free energy methods: the effect of protein mutations on inhibitor binding

Agastya P. Bhati, Shunzhou Wan, and Peter V. Coveney\*

*Centre for Computational Science, Department of Chemistry, University College London,  
20 Gordon Street, London WC1H 0AJ, United Kingdom*

E-mail: p.v.coveney@ucl.ac.uk

Phone: +44 (0)20 7679 4802

The main article describes the application of TIES, TIES- $\lambda$ -REST2, and TIES- $\lambda$ -REST2-M to predict binding free energy changes of inhibitors cause by protein mutations. We used different  $T_{eff}$  values, the highest effective REST2 temperature, for the receptor and the complexes to check the accuracy and convergence of the free energy calculations. The Supporting Information provides, in order of appearance, more details of the calculated free energies from the V555M (Table S1), I538V (Table S2), and N540S (Table S3) mutations with the highest  $T_{eff}$  of 600 K for the receptor and 600 K/1500 K for the complexes; as well as detailed results for V555M (Table S4), I538V (Table S5), and N540S (Table S6) mutations with the highest  $T_{eff}$  of 1500 K for the receptor and 3000 K for the complexes. Table S7 shows the occupancies of hydrogen bonds between the inhibitors and the protein.

Table S1: Free energy predictions for the WT-V555M transformation using TIES and schemes  $\lambda$ R2 and  $\lambda$ R2-M (**up to 4 ns simulation time**). Corresponding experimental values are also shown. The values in brackets denote the error bars. All values are in kcal/mol.

| Drug           | $\Delta G_{alch}$ |              |                |             |              |                | $\Delta\Delta G_{alch}$ |              |                | $\Delta\Delta G_{exp}$ |
|----------------|-------------------|--------------|----------------|-------------|--------------|----------------|-------------------------|--------------|----------------|------------------------|
|                | rec               |              |                | com         |              |                | TIES                    | $\lambda$ R2 | $\lambda$ R2-M |                        |
|                | TIES              | $\lambda$ R2 | $\lambda$ R2-M | TIES        | $\lambda$ R2 | $\lambda$ R2-M |                         |              |                |                        |
| AZD4547-linear |                   |              |                | 0.11(0.27)  | -0.42(0.06)  | -0.46(0.05)    | -3.56(0.31)             | -2.76(0.12)  | -2.70(0.12)    | -1.75(0.33)            |
| AZD4547-bent   |                   |              |                | -4.00(0.38) | -1.12(0.05)  | -1.18(0.04)    | 0.55(0.41)              | -2.07(0.11)  | -1.98(0.12)    |                        |
| BGJ-398        | -3.45(0.16)       | -3.18(0.10)  | -3.16(0.11)    | -0.43(0.41) | 0.48(0.07)   | 0.44(0.06)     | -3.02(0.44)             | -3.66(0.12)  | -3.60(0.12)    | -1.19(0.08)            |
| TKI258         |                   |              |                | -3.71(0.19) | -2.01(0.08)  | -2.05(0.07)    | 0.26(0.25)              | -1.17(0.13)  | -1.11(0.13)    | 0.97(0.22)             |
| JNJ42756493    |                   |              |                | 1.74(0.34)  | 0.81(0.12)   | 0.76(0.10)     | -5.19(0.38)             | -3.99(0.16)  | -3.92(0.15)    | -3.08(0.17)            |

Table S2: Free energy predictions for the WT-I538V transformation using TIES and schemes  $\lambda$ R2 and  $\lambda$ R2-M (**up to 4 ns simulation time**). Corresponding experimental values are also shown. The values in brackets denote the error bars. All values are in kcal/mol.

| Drug           | $\Delta G_{alch}$ |              |                |             |              |                | $\Delta\Delta G_{alch}$ |              |                | $\Delta\Delta G_{exp}$ |
|----------------|-------------------|--------------|----------------|-------------|--------------|----------------|-------------------------|--------------|----------------|------------------------|
|                | rec               |              |                | com         |              |                | TIES                    | $\lambda$ R2 | $\lambda$ R2-M |                        |
|                | TIES              | $\lambda$ R2 | $\lambda$ R2-M | TIES        | $\lambda$ R2 | $\lambda$ R2-M |                         |              |                |                        |
| AZD4547-linear |                   |              |                | -0.99(0.23) | -0.52(0.05)  | -0.56(0.04)    | 0.25(0.33)              | 0.09(0.11)   | 0.05(0.11)     | -2.11(0.32)            |
| BGJ-398        |                   |              |                | -1.18(0.26) | -0.89(0.05)  | -0.96(0.04)    | 0.44(0.35)              | 0.46(0.11)   | 0.45(0.11)     | -0.74(0.21)            |
| TKI258         | -0.74(0.24)       | -0.43(0.10)  | -0.51(0.10)    | -0.09(0.30) | -0.90(0.08)  | -0.89(0.07)    | -0.65(0.38)             | 0.47(0.13)   | 0.38(0.12)     | -1.91(0.13)            |
| JNJ42756493    |                   |              |                | -1.36(0.24) | -0.73(0.07)  | -0.79(0.06)    | 0.62(0.34)              | 0.30(0.12)   | 0.28(0.12)     | -2.18(0.10)            |

Table S3: Free energy predictions for the WT-N540S transformation using TIES and schemes  $\lambda$ R2 and  $\lambda$ R2-M (**up to 4 ns simulation time**). Corresponding experimental values are also shown. The values in brackets denote the error bars. All values are in kcal/mol.

| Drug           | $\Delta G_{alch}$ |              |                |            |              |                | $\Delta\Delta G_{alch}$ |              |                | $\Delta\Delta G_{exp}$ |
|----------------|-------------------|--------------|----------------|------------|--------------|----------------|-------------------------|--------------|----------------|------------------------|
|                | rec               |              |                | com        |              |                | TIES                    | $\lambda$ R2 | $\lambda$ R2-M |                        |
|                | TIES              | $\lambda$ R2 | $\lambda$ R2-M | TIES       | $\lambda$ R2 | $\lambda$ R2-M |                         |              |                |                        |
| AZD4547-linear |                   |              |                | 3.41(0.23) | 1.72(0.07)   | 1.67(0.07)     | -0.43(0.43)             | 0.91(0.14)   | 0.95(0.14)     | -0.76(0.33)            |
| BGJ-398        | 2.98(0.36)        | 2.63(0.12)   | 2.62(0.12)     | 3.98(0.38) | 1.50(0.07)   | 1.46(0.06)     | -1.00(0.52)             | 1.13(0.14)   | 1.16(0.13)     | 0.25(0.19)             |
| TKI258         |                   |              |                | 4.75(0.48) | 1.61(0.08)   | 1.51(0.08)     | -1.77(0.60)             | 1.02(0.14)   | 1.11(0.14)     | -0.9(0.15)             |
| JNJ42756493    |                   |              |                | 3.85(0.27) | 1.57(0.08)   | 1.51(0.08)     | -0.87(0.45)             | 1.06(0.14)   | 1.11(0.14)     | -1.75(0.21)            |

Table S4: Free energy predictions for the WT-V555M transformation using TIES and schemes  $\lambda$ R2 and  $\lambda$ R2-M (**up to 4 ns simulation time but the highest  $T_{eff}$  increased to 1500 K/3000 K**). Corresponding experimental values are also shown. The values in brackets denote the error bars. All values are in kcal/mol.

| Drug           | $\Delta G_{alch}$ |              |                |             |              |                | $\Delta\Delta G_{alch}$ |              |                | $\Delta\Delta G_{exp}$ |
|----------------|-------------------|--------------|----------------|-------------|--------------|----------------|-------------------------|--------------|----------------|------------------------|
|                | rec               |              |                | com         |              |                | TIES                    | $\lambda$ R2 | $\lambda$ R2-M |                        |
|                | TIES              | $\lambda$ R2 | $\lambda$ R2-M | TIES        | $\lambda$ R2 | $\lambda$ R2-M |                         |              |                |                        |
| AZD4547-linear |                   |              |                | 0.11(0.27)  | 0.20(0.04)   | 0.14(0.04)     | -3.56(0.31)             | -1.85(0.07)  | -1.82(0.06)    | -1.75(0.33)            |
| AZD4547-bent   |                   |              |                | -4.00(0.38) | -0.58(0.04)  | -0.57(0.04)    | 0.55(0.41)              | -1.07(0.07)  | -1.11(0.06)    |                        |
| BGJ-398        | -3.45(0.16)       | -1.65(0.06)  | -1.68(0.05)    | -0.43(0.41) | 0.27(0.05)   | 0.28(0.04)     | -3.02(0.44)             | -1.92(0.08)  | -1.96(0.06)    | -1.19(0.08)            |
| TKI258         |                   |              |                | -3.71(0.19) | -0.24(0.05)  | -0.26(0.04)    | 0.26(0.25)              | -1.41(0.08)  | -1.42(0.06)    | 0.97(0.22)             |
| JNJ42756493    |                   |              |                | 1.74(0.34)  | 1.23(0.10)   | 1.19(0.10)     | -5.19(0.38)             | -2.88(0.12)  | -2.87(0.11)    | -3.08(0.17)            |

Table S5: Free energy predictions for the WT-I538V transformation using TIES and schemes  $\lambda$ R2 and  $\lambda$ R2-M (**up to 4 ns simulation time but the highest  $T_{eff}$  increased to 1500 K/3000 K**). Corresponding experimental values are also shown. The values in brackets denote the error bars. All values are in kcal/mol.

| Drug           | $\Delta G_{alch}$ |              |                |             |              |                | $\Delta\Delta G_{alch}$ |              |                | $\Delta\Delta G_{exp}$ |
|----------------|-------------------|--------------|----------------|-------------|--------------|----------------|-------------------------|--------------|----------------|------------------------|
|                | rec               |              |                | com         |              |                | TIES                    | $\lambda$ R2 | $\lambda$ R2-M |                        |
|                | TIES              | $\lambda$ R2 | $\lambda$ R2-M | TIES        | $\lambda$ R2 | $\lambda$ R2-M |                         |              |                |                        |
| AZD4547-linear |                   |              |                | -0.99(0.23) | -0.78(0.06)  | -0.83(0.04)    | 0.25(0.33)              | -0.12(0.08)  | -0.04(0.07)    | -2.11(0.32)            |
| BGJ-398        |                   |              |                | -1.18(0.26) | -0.91(0.05)  | -0.96(0.04)    | 0.44(0.35)              | 0.01(0.08)   | 0.09(0.07)     | -0.74(0.21)            |
| TKI258         | -0.74(0.24)       | -0.90(0.06)  | -0.87(0.06)    | -0.09(0.30) | -0.91(0.06)  | -0.99(0.06)    | -0.65(0.38)             | 0.01(0.08)   | 0.12(0.08)     | -1.91(0.13)            |
| JNJ42756493    |                   |              |                | -1.36(0.24) | -0.89(0.04)  | -0.98(0.03)    | 0.62(0.34)              | -0.01(0.07)  | 0.11(0.07)     | -2.18(0.10)            |

Table S6: Free energy predictions for the WT-N540S transformation using TIES and schemes  $\lambda$ R2 and  $\lambda$ R2-M (**up to 4 ns simulation time but the highest  $T_{eff}$  increased to 1500 K/3000 K**). Corresponding experimental values are also shown. The values in brackets denote the error bars. All values are in kcal/mol.

| Drug           | $\Delta G_{alch}$ |              |                |            |              |                | $\Delta\Delta G_{alch}$ |              |                | $\Delta\Delta G_{exp}$ |
|----------------|-------------------|--------------|----------------|------------|--------------|----------------|-------------------------|--------------|----------------|------------------------|
|                | rec               |              |                | com        |              |                | TIES                    | $\lambda$ R2 | $\lambda$ R2-M |                        |
|                | TIES              | $\lambda$ R2 | $\lambda$ R2-M | TIES       | $\lambda$ R2 | $\lambda$ R2-M |                         |              |                |                        |
| AZD4547-normal |                   |              |                | 3.41(0.23) | 0.89(0.05)   | 0.82(0.05)     | -0.43(0.43)             | 0.72(0.11)   | 0.74(0.11)     | -0.76(0.33)            |
| BGJ-398        |                   |              |                | 3.98(0.38) | 0.94(0.05)   | 0.89(0.04)     | -1.00(0.52)             | 0.67(0.11)   | 0.67(0.11)     | 0.25(0.19)             |
| TKI258         | 2.98(0.36)        | 1.61(0.10)   | 1.56(0.10)     | 4.75(0.48) | 0.90(0.06)   | 0.84(0.06)     | -1.77(0.60)             | 0.71(0.12)   | 0.72(0.12)     | -0.9(0.15)             |
| JNJ42756493    |                   |              |                | 3.85(0.27) | 0.89(0.07)   | 0.84(0.06)     | -0.87(0.45)             | 0.72(0.12)   | 0.72(0.12)     | -1.75(0.21)            |

Table S7: Occupancies (%) of the hydrogen bonds between glutamic acid and analine residues of the hinge region and the inhibitor for all complexes using the standard TIES as well as  $\lambda$ -REST2 simulations at both end-points of the alchemical transformations studied. “hot” denotes if the residue is included in the REST2 region or not.

| Mutant | Drug         | ALA:100 |                                   |                             |               |                                   |              | GLU:98 <sup>‡</sup>               |              |               |            |
|--------|--------------|---------|-----------------------------------|-----------------------------|---------------|-----------------------------------|--------------|-----------------------------------|--------------|---------------|------------|
|        |              | “hot”   | H-bond occupancy (%) <sup>†</sup> |                             |               |                                   | “hot”        | H-bond occupancy (%) <sup>†</sup> |              |               |            |
|        |              |         | $\lambda = 0$                     |                             | $\lambda = 1$ |                                   |              | $\lambda = 0$                     |              | $\lambda = 1$ |            |
| TIES   | $\lambda R2$ | TIES    | $\lambda R2$                      | TIES                        | $\lambda R2$  | TIES                              | $\lambda R2$ | TIES                              | $\lambda R2$ |               |            |
| V2M    | AZD-l        | n       | 67.4, 3.6                         | 69.4, 5.7                   | 66.6, 5.8     | 67.0, 5.3                         | y            | 91.4                              | 88.6         | 87.9          | 84.0       |
|        | AZD-b        | n       | 45.8, 1.5                         | 54.5, 3.2                   | 55.5, 2.4     | 48.9, 1.9                         | y            | 89.9                              | 88.8         | 84.4          | 89.3       |
|        | BGJ          | n       | 40.4, 14.0                        | 44.3, 24.7                  | 51.1, 13.4    | 50.2, 10.0                        | y            | -                                 | -            | -             | -          |
|        | TKI          | n       | 69.0                              | 68.6                        | 65.5          | 59.2, 0.4                         | y            | 30.6                              | 20.7         | 29.2          | 15.0       |
|        | JNJ          | n       | 21.2                              | 25.2                        | 28.4          | 20.8                              | y            | -                                 | -            | -             | -          |
| I2V    | AZD-l        | n       | 68.8, 4.7                         | 68.5, 4.8                   | 68.4, 6.2     | 71.3, 6.2                         | n            | 90.4                              | 90.3         | 90.0          | 89.0       |
|        | BGJ          | n       | 39.4, 30.2                        | 39.7, 32.3                  | 50.6, 16.6    | 41.5, 29.4                        | n            | -                                 | -            | -             | -          |
|        | TKI          | y       | 75.6                              | 69.2, 0.4*, 0.2             | 57.7          | 52.9, 6.7*, 2.2*, 2.2*, 1.0*, 0.1 | n            | 27.4                              | 30.3         | 27.8          | 16.9       |
|        | JNJ          | n       | 24.0                              | 25.4                        | 21.3          | 27.4                              | n            | -                                 | -            | -             | -          |
| N2S    | AZD-l        | n       | 70.5, 6.4                         | 67.4, 6.4                   | 68.9, 7.6     | 70.0, 7.4                         | y            | 90.8                              | 88.0         | 88.3          | 89.2       |
|        | BGJ          | n       | 39.3, 26.3                        | 41.8, 31.0                  | 41.4, 24.8    | 34.3, 36.5                        | y            | -                                 | -            | -             | -          |
|        | TKI          | y       | 70.3                              | 50.3, 2.6*, 1.4*, 1.3, 0.4* | 57.2          | 51.8, 4.6*, 3.4*, 1.4*, 1.0*, 0.1 | y            | 28.5                              | 15.9         | 32.7          | 20.4, 1.0* |
|        | JNJ          | n       | 19.6                              | 25.8                        | 18.3          | 27.0                              | y            | -                                 | -            | -             | -          |

<sup>‡</sup> GLU:98 does not form any H-bond with BGJ-298 and JNJ42756493.

<sup>†</sup> Asterisk denotes flipped conformations of the inhibitor TKI258.
